# Supplementary material
Source: MDPI journal article supplement (https://www.mdpi.com/2571-8789/8/2/43)
Supplement: s1 [file s1]

Archive with 1 entries (1 files):
- soilsystems-2902962-supplementary.pdf
